# Electrical stimulation in hippocampus and entorhinal cortex impairs spatial and temporal memory

Abhinav Goyal<sup>1</sup>, Jonathan Miller<sup>1</sup>, Andrew J. Watrous<sup>1</sup>, Sang Ah Lee<sup>2</sup>, Tom Coffey<sup>3</sup>, Michael R. Sperling<sup>4</sup>, Ashwini Sharan<sup>4</sup>, Gregory Worrell<sup>5</sup>, Brent Berry<sup>5,6</sup>, Bradley Lega<sup>7</sup>, Barbara Jobst<sup>8</sup>, Kathryn A. Davis<sup>9</sup>, Cory Inman<sup>11</sup>, Sameer A. Sheth<sup>12</sup>, Paul A. Wanda<sup>13</sup>, Youssef Ezzyat<sup>13</sup>, Sandhitsu R. Das<sup>9,10</sup>, Joel Stein<sup>9</sup>, Richard Gorniak<sup>4</sup>, and Joshua Jacobs\*<sup>1</sup>

<sup>1</sup>Department of Biomedical Engineering, Columbia University, New York, NY 10027

<sup>2</sup>Korea Advanced Institute of Science and Technology

<sup>3</sup>Department of Biomedical Engineering, Drexel University, Philadelphia, PA 19104

<sup>4</sup>Thomas Jefferson University, Philadelphia, PA 19107

<sup>5</sup>Mayo Clinic, Rochester, MN 55905

<sup>6</sup>University of Minnesota, MN 55455

<sup>7</sup>University of Texas, Southwestern, Dallas, TX 75390

<sup>8</sup>Geisel School of Medicine at Dartmouth, Hanover, NH 03755

<sup>9</sup>Hospital of the University of Pennsylvania, Philadelphia, PA 19104

<sup>10</sup>Department of Neurology, University of Pennsylvania, Philadelphia, PA 19104

<sup>11</sup>Department of Neurosurgery, Emory University, Atlanta, GA 30322

<sup>12</sup>Department of Neurosurgery, Columbia University Medical Center, New York, NY 10032

<sup>13</sup>Department of Psychology, University of Pennsylvania, Philadelphia, PA 19104

---

\*Correspondence: [joshua.jacobs@columbia.edu](mailto:joshua.jacobs@columbia.edu), 351 Engineering Terrace, Mail Code 8904, 1210 Amsterdam Avenue, New York, NY 10027, 212-854-2445

20

## Abstract

21 The medial temporal lobe (MTL) is widely implicated in supporting episodic memory and navi-  
22 gation, but its precise functional role in organizing memory across time and space remains elusive.  
23 Here we examine the specific cognitive processes implemented by MTL structures (hippocampus  
24 and entorhinal cortex) to organize memory by using electrical brain stimulation, leveraging its ability  
25 to establish causal links between brain regions and features of behavior. We studied neurosurgical  
26 patients of both sexes who performed spatial-navigation and verbal-episodic memory tasks while  
27 brain stimulation was applied in various regions during learning. During the verbal memory  
28 task, stimulation in the MTL disrupted the temporal organization of encoded memories such that  
29 items learned with stimulation tended to be recalled in a more randomized order. During the  
30 spatial task, MTL stimulation impaired subjects' abilities to remember items located far away from  
31 boundaries. These stimulation effects were specific to the MTL. Our findings thus provide the first  
32 causal demonstration in humans of the specific memory processes that are performed by the MTL  
33 to encode when and where events occurred.

34

35

## Significance Statement

36 Numerous studies have implicated the medial temporal lobe (MTL) in encoding spatial and  
37 temporal memories, but they have not been able to causally demonstrate the nature of the cognitive  
38 processes by which this occurs in real-time. Electrical brain stimulation is able to demonstrate causal  
39 links between a brain region and a given function with high temporal precision. By examining  
40 behavior in a memory task as subjects received MTL stimulation, we provide the first causal  
41 evidence demonstrating the role of the MTL in organizing the spatial and temporal aspects of  
42 episodic memory.

## 43 **Introduction**

44 The medial temporal lobe (MTL) plays a key role in encoding episodic memories for various types  
45 of spatial and temporal information (Eichenbaum, 2004; Cohen & Eichenbaum, 1993; Ekstrom et al.,  
46 2011). The importance of the MTL for memory is now well accepted, as researchers have reported  
47 concordant evidence from multiple methods, including observational studies of lesion patients  
48 (Scoville & Milner, 1957), experiments in rodents (O'Keefe & Dostrovsky, 1971), and, more recently,  
49 with data from noninvasive neuroimaging (Henson, 2005). However, although we know that the  
50 MTL is vital for episodic memory in general, we do not precisely understand the computational  
51 nature of the processes that the MTL employs to encode individual episodic memories in various  
52 contexts (Howard & Eichenbaum, 2015; Guderian et al., 2015; Maguire et al., 2015; Douglas et al.,  
53 2016).

54 Traditional methods for investigating the anatomical basis of human cognitive processes, such  
55 as lesion and neuroimaging approaches, have provided a plethora of information regarding the  
56 role of the MTL in memory (Bohbot et al., 2004; Copara et al., 2014; Suthana et al., 2009; Kolarik  
57 et al., 2017), but are unable to demonstrate causal links between a given brain region and a set  
58 of functions with high temporal precision. Localization of lesions is often uncontrolled, and the  
59 permanent nature of brain injury results in poor temporal resolution. Thus, one cannot always use  
60 lesion studies to perfectly identify the specific circumstances under which a given brain region  
61 is necessary for a given behavior (Rorden & Karnath, 2004). Analogously, neuroimaging studies  
62 are correlational, and are therefore unable to provide conclusive evidence about the necessity of a  
63 given brain region for a specific task in human subjects (Rorden & Karnath, 2004; Friston et al.,  
64 2002; Ramsey et al., 2010).

65 A different approach for probing brain function in humans is neuromodulation. Neuromodula-  
66 tion is promising because it can establish causal relationships between a brain region and particular  
67 behavioral functions (Knotkova & Rasche, 2014; S. H. Lee & Dan, 2012). Neuromodulation  
68 techniques such as optogenetics, transcranial magnetic stimulation (TMS), and electrical brain  
69 stimulation (EBS) allow researchers to transiently alter processing in a region and to determine  
70 the effects of this modulation on task performance (Suthana & Fried, 2014; Knotkova & Rasche,  
71 2014). Showing that a cognitive process is transiently altered when a particular region is specifically

72 stimulated demonstrates a causal link between the two (Suthana & Fried, 2014). Optogenetics  
73 is currently only implemented in animals, and TMS is only able to target neocortical structures  
74 (Klomjai et al., 2015). However, EBS is a viable research approach for certain neurosurgical patients,  
75 as it can target subcortical structures such as the hippocampus, making it a useful approach to  
76 directly map cognitive function in humans.

77 Previous work has shown that 50-Hz MTL stimulation impairs spatial and episodic memory  
78 overall (Jacobs et al., 2016). We move beyond the results of that work here by using an improved  
79 analytic approach on this dataset to identify the specific features of memory that were perturbed  
80 by stimulation. To foreshadow our results, we find that in the verbal domain, MTL stimulation  
81 disrupted the temporal ordering of episodic memory and impaired the recall of items from early  
82 list positions. Analogously, we found that stimulation specifically disrupted spatial memories for  
83 objects located far from boundaries, which we hypothesized were encoded with MTL-dependent  
84 representations, potentially based on grid or place cells. By performing quantitative, item-level  
85 analyses of behavioral data collected during brain stimulation, our findings provide the first causal  
86 and temporally precise demonstration of the specific cognitive processes that the MTL utilizes to  
87 organize episodic memories across time and space.

## 88 **Methods**

89 We analyzed data from 49 epilepsy patients (32 female and 17 male) who had surgically implanted  
90 electrodes for localization of seizure foci as part of their evaluation for epilepsy surgery. Patients  
91 performed verbal-episodic and spatial memory tasks that we adapted such that direct brain  
92 stimulation was applied during some learning trials.

93 In each session, a selected electrode pair was connected to an electrical stimulator (Grass  
94 Technologies or Blackrock Microsystems). Stimulators were configured to deliver bipolar stimulation  
95 current between a pair of electrodes, each with a surface area of 0.059 cm<sup>2</sup>. MTL structures were  
96 stimulated using depth electrodes separated by either 5 or 10 mm, while strip and grid electrodes  
97 targeted other neocortical structures. Stimulation was applied at 50 Hz with a balanced biphasic  
98 stimulation pulse of 300  $\mu$ s per phase for 1 second. Under clinical supervision, we began each  
99 session by manually testing a range of currents for each site, beginning at 0.5 mA and slowly

100 increasing to a maximum of 1.5 mA (depth electrodes) or 3.0 mA (surface electrodes). The final  
101 stimulation current that was used for the cognitive experiments was the maximum current for each  
102 site that could be applied without inducing patient symptoms, epileptiform afterdischarges, or  
103 seizures.

104 We determined the anatomical location of each implanted electrode by examining an MRI scan,  
105 which provided a high resolution image of the hippocampus and MTL (0.5 mm × 0.5 mm × 2  
106 mm resolution). Depth electrodes in the MTL were localized via a semi-automatic process. First,  
107 MTL subregions were labeled within the MRI using a multi-atlas based segmentation technique  
108 (H. Wang et al., 2013; Yushkevich et al., 2015). A neuroradiologist then identified each electrode  
109 contact on a post-implant CT scan, which was then co-registered with the MRI (Avants et al., 2008),  
110 and an anatomic label for each contact was automatically generated. Finally, the neuroradiologist  
111 visually confirmed the accuracy of the labeled location of the implant (Jacobs et al., 2016; Suthana et  
112 al., 2012). We designated a stimulation site as targeting a particular region if at least one electrode of  
113 the bipolar pair was in the region. Note that unlike our previous study, which analyzed stimulation  
114 effects at the level of individual sessions (Jacobs et al., 2016), here we analyzed stimulation-related  
115 changes to memory performance at the subject level, which is a slightly more conservative approach  
116 but nonetheless provided convergent results.

117 Each subject provided informed, written consent prior to participation. Our multisite study  
118 was approved by local institutional review boards (IRBs), the IRB of the University of Pennsylvania  
119 (data coordination site), and the Human Research Protection Official (HRPO) at the Space and  
120 Naval Warfare Systems Center Pacific (SPAWAR/SSC). The raw data are publically available  
121 (<http://memory.psych.upenn.edu/>) and were analyzed previously (Jacobs et al., 2016) but the  
122 results presented here are novel.

123 **Verbal Task.** 39 patients (23 with MTL stimulation) performed the free recall task (Sederberg et  
124 al., 2003) while stimulation was applied during the learning of some items. Figure 1A presents  
125 a timeline of this task. During each trial, subjects were asked to memorize a list of 12 words  
126 sequentially presented as text on the computer screen. Each word was presented for 1600 ms,  
127 followed by a blank screen for 750–1000 ms. Lists consisted of high-frequency nouns ([http://](http://www.memory.psych.upenn.edu/WordPools)  
128 [www.memory.psych.upenn.edu/WordPools](http://www.memory.psych.upenn.edu/WordPools)). After a 20-s math distractor task, subjects were given

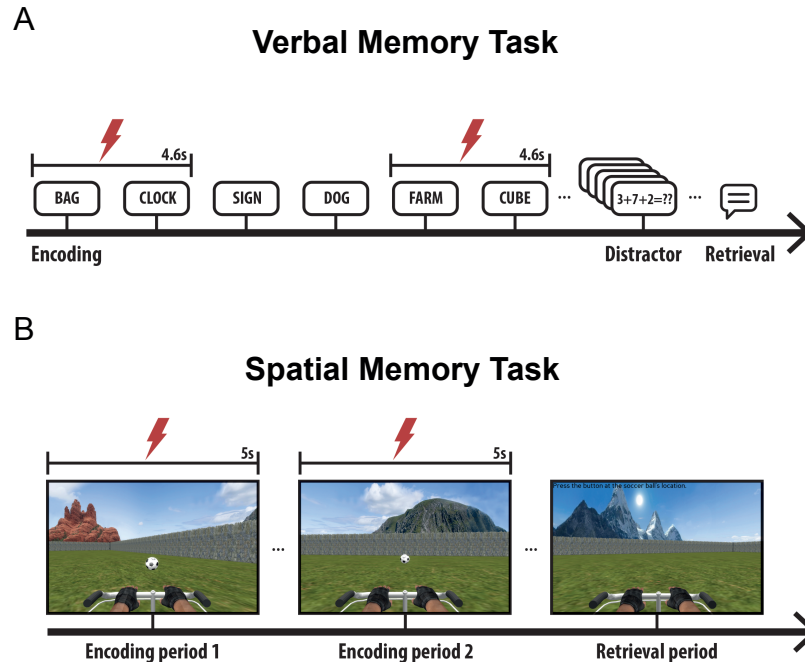

Figure 1: **Overview of verbal and spatial memory tasks** **A.** Timeline of the verbal memory task. Half of the words on stimulated lists are encoded with the stimulator active. **B.** Overview of the spatial task. Half of the trials occurred with the stimulator active during both encoding periods. Taken from Jacobs et al. (2016) with permission.

129 30 s to verbally recall the words in any order. We recorded the verbal word responses for later  
130 manual scoring.

131 Lists consisted of two types: stimulated lists, in which half of the words on the list were delivered  
132 simultaneously with electrical brain stimulation, and control lists, in which all twelve words on a  
133 list were presented without stimulation. Each session included 25 lists, consisting of 20 stimulated  
134 lists and 5 control lists in a random order. For each stimulated list, stimulation occurred in a blocked  
135 pattern: the stimulator was active during the presentation of a pair of consecutive words and then  
136 inactive for the following pair. Thus, in total, on each stimulated list the stimulator was active  
137 for half the total words. When the stimulator activated, it was timed to occur 200 ms prior to the  
138 presentation of the first word in each block, continuing for 4.6 s, until the disappearance of the  
139 second word. The onset of stimulation was balanced, such that a random half of the stimulation  
140 lists began with a non-stimulated block and the others began with a stimulated block.

141 **Data Analysis: Free Recall Task.** Our analyses of data from the Free Recall task followed methods  
142 used in other studies (Kahana, 2012), adapted for examining the behavioral effects of stimulation. To  
143 examine how the effects of stimulation on memory varied over the timecourse of each stimulation  
144 cycle, we separately measured recall probability according to the position (“phase”) of an item  
145 within a stimulated or non-stimulated block. For this analysis, we averaged recall probability for  
146 each phase within stimulated and non-stimulated blocks and then normalized relative to matched  
147 positions on control lists.

148 For some analyses we separately measured memory performance as a function of list position.  
149 We defined the primacy period as the first two items on each list, consistent with previous free  
150 recall studies using similar list lengths (Fischler et al., 1970; Craik, 1970). This classification fit the  
151 data because, after drops in performance between the recall rates for the first two list positions of  
152 more than 0.06, memory performance was roughly comparable across positions 3–5 (changes in  
153 recall rates of less than 0.025).

154 To assess the effect of stimulation on erroneous recalls, we measured the rates of prior list  
155 intrusions (PLIs) (Darley & Murdock, 1971), which occurred when subjects incorrectly recalled an  
156 item from the previous list during the current list’s recall period. Many PLI probabilities were close  
157 to zero, therefore we assessed significance using nonparametric statistics.

158 In free recall, subjects exhibit a strong tendency to cluster recall sequences based on the temporal  
159 proximity of the items during study. We examined the effect of stimulation on this effect clustering  
160 by computing two measures of temporal clustering: temporal clustering factors (TCF) (Polyn et al.,  
161 2009b) and conditional response probabilities (CRPs) (Kahana, 1996). The TCF is a number that  
162 measures the mean tendency for recall transitions to occur between items presented at nearby list  
163 positions. A TCF of 1 indicates perfect temporal contiguity, with the subject only making transitions  
164 to temporally adjacent items, while a TCF of 0.5 indicates that the subject is making transitions  
165 randomly (Polyn et al., 2009a). The CRP is a curve that indicates the conditional probability of  
166 a particular item being recalled as a function of the difference in its position in the learned list  
167 relative to that of the previously recalled item. We performed all TCF and CRP comparisons with  
168 non-parametric tests. To rule out the possibility that differences in mean recall rates between  
169 stimulated and control lists led to apparent changes in TCFs, we used a downsampling procedure  
170 to artificially match recall rates between stimulated and non-stimulated lists.

171 We also examined the effects of stimulation on non-MTL regions. 5 subjects received stimulation  
172 in the frontal lobe, 2 in the cingulate, and 2 in the lateral temporal lobe. We termed these “neocortex”  
173 regions. To identify potential results caused by sample size differences between the MTL and  
174 neocortex datasets, we reperformed our analyses using a bootstrap procedure. In this procedure we  
175 chose a random subset of 9 MTL electrodes and then computed the effect of interest and confidence  
176 intervals across 1,000 iterations.

177 **Spatial Task.** In the spatial memory task (Fig. 1B), 26 subjects received MTL stimulation while  
178 participating in a virtual navigation paradigm that is reminiscent of the Morris (1984) water maze.  
179 Eight of these subjects also participated in the verbal task with MTL stimulation. The environment  
180 was rectangular (1.8:1 aspect ratio), and was surrounded by a continuous boundary. There were  
181 four distal visual cues (landmarks), one centered on each side of the rectangle, to aid with orienting.  
182 Each trial started with two 5-s encoding periods, during which subjects were driven to an object  
183 from a random starting location. At the beginning of an encoding period, the object appeared and,  
184 over the course of 5 s, the subject was automatically driven directly towards it. The 5 second period  
185 consisted of three intervals: first, the subject was rotated towards the object (1 s), second, the subject  
186 was driven towards the object (3 s), and, finally, the subject paused while at the object location (1 s).  
187 After a 5-second delay with a blank screen, the same process was repeated from a different starting  
188 location. Alternating trials (24 out of the 48) were designated as stimulation trials, during which  
189 stimulation was applied throughout the 5 s of time while the object was visible to the subject for  
190 both encoding periods.

191 After both encoding periods for each item, there was a 5-s pause followed by the test period. The  
192 subject was placed in the environment at a random starting location with the object hidden and then  
193 asked to freely navigate using a joystick to the location where they thought the object was located.  
194 When they reached their chosen location, they pressed a button to record their response. They  
195 then received feedback on their performance via an overhead view of the environment showing  
196 the actual and reported object locations. Between stimulation and non-stimulation trials, starting  
197 location, starting orientation, and object location were all counterbalanced. This was achieved  
198 by creating a set of location triads for the stimulated conditions and transposing them across the  
199 environment’s diagonal for use in non-stimulation trials, ensuring that the geometric relationship



200 between the start and object locations was matched in stimulation and non-stimulation trials.

201 **Data Analysis: Spatial Memory Task.** Performance in the spatial task was measured by comput-  
202 ing the distance between the reported and actual locations for each object. In the same manner as  
203 Jacobs et al. (2016), we normalized this euclidean distance metric into a memory score (MS) between  
204 the range of 0 and 1, where a value of 1 indicates a perfect response and a value of 0 indicates the  
205 worst possible response given the object's location. This normalization took the form of ranking the  
206 subject's actual response compared to all other possible responses. This normalization procedure  
207 removes potential bias in the results by accounting for the fact that the distribution of possible  
208 response error distances varies according to the object's distance from the boundaries; it also  
209 corrects for the rectangular shape of the environment. Namely, objects near boundaries had a larger  
210 maximum possible error distance than objects in the interior. Subjects with an average MS of less  
211 than chance (0.5) were excluded from all analyses. We utilized Tukey's honest significant difference  
212 (HSD) correction for multiple comparisons when performing post-hoc analyses of analysis of  
213 variance tests.

214 Previous studies have shown that boundaries play a crucial role in guiding navigational behavior  
215 (Chan et al., 2012; S. A. Lee et al., 2018; Hartley et al., 2004; S. A. Lee, 2017), so we chose to analyze  
216 the effect of object location on subject performance. To this end, we divided the environment into  
217 "boundary" and "interior" regions of equal area by creating an inner rectangle with an identical  
218 aspect ratio to the environment itself.

219 We hypothesized that subjects sometimes utilized view-based spatial memory strategies, which  
220 rely on facing the same direction during encoding and recall. Such strategies would be most  
221 effective where salient visual scenes were most prominent, which occurred when the subject was  
222 close to the environment's boundaries. To test whether some subjects might have used such a  
223 strategy, we labeled the directions that subjects faced at the end of the learning trials and the test  
224 trials as the "headings" for that trial. The circular mean of the two learning headings was then  
225 subtracted from the test heading to compute the trial's learning-test heading difference. All heading  
226 statistics were calculated with circular statistics (Berens, 2009).

227 We conducted a simulation to assess the possibility that our task's design led to artificially  
228 decreased heading differences between learning and test for certain areas of the environment. In

229 a single iteration of this procedure, we simulated 1,000 learning and test trials, with randomly  
230 generated start and end locations. For each simulated test trial, the simulated “subject” drove in a  
231 straight line from the start to the end location. Then, across these 1,000 trials, we computed the  
232 mean vector length ( $\bar{R}$ ) of the trial-wise learning–test heading differences. This entire procedure  
233 was then repeated 100 times to establish confidence intervals for  $\bar{R}$ .

## 234 **Results**

235 We sought to determine how electrical stimulation of the hippocampus and entorhinal cortex  
236 influences the precise temporal and spatial organization of memory. To answer this question, we  
237 conducted new analyses of a previously published dataset (Jacobs et al., 2016) in which subjects  
238 performed spatial and episodic memory tasks with concurrent brain stimulation in the MTL. Going  
239 beyond the previous study, which reported that MTL stimulation reduced verbal and spatial  
240 memory performance overall, our new analyses show that MTL stimulation selectively disrupted  
241 the temporal organization of verbal memory and the ability to encode spatial locations in an  
242 environment without visual cues from boundaries.

### 243 **Verbal Episodic Memory**

244 In the verbal memory task, subjects learned two types of word lists: stimulated lists and control  
245 lists. On stimulated lists, electrical stimulation was present for alternating blocks of two items  
246 at a time. Therefore, items on stimulated lists consisted of two categories: those delivered with  
247 stimulation (“stimulated items”) and those delivered without (“non-stimulated items on stimulated  
248 lists”). Control lists consisted entirely of items delivered without stimulation. Our data analyses  
249 separately examined recall rates across items from different categories. As reported in Jacobs et al.  
250 (2016), recall rates were lower for stimulated items relative to non-stimulated items ( $t_{22} = -2.29$ ,  
251  $p = 0.04$ , paired  $t$ -test), indicating that MTL stimulation impaired memory encoding. Going beyond  
252 this earlier work, we examined the time course of the effects of stimulation and whether stimulation  
253 affected memory for the order of learned items.

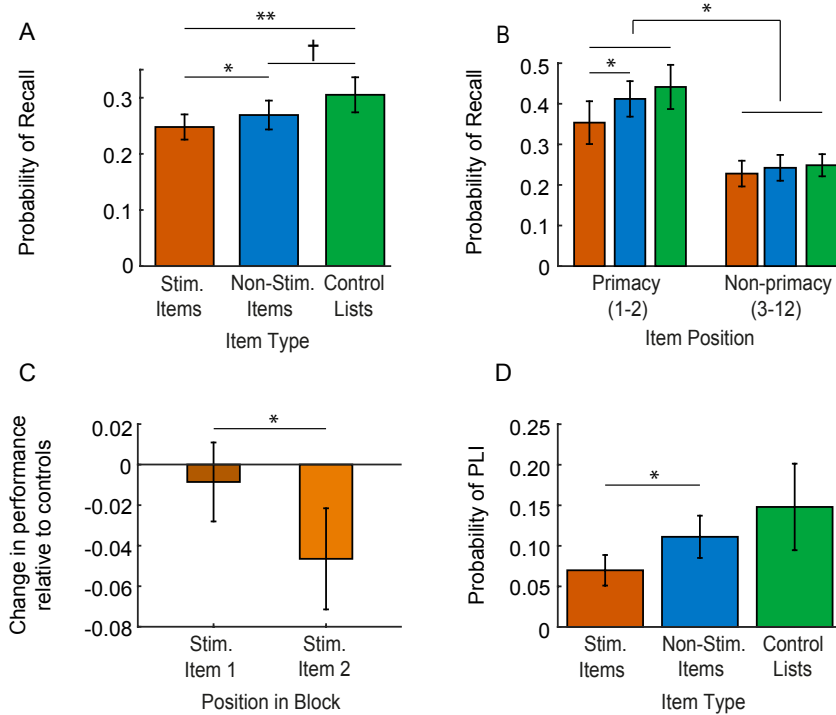

Figure 2: **Effect of MTL stimulation on verbal memory encoding in free recall.** **A.** Probability of item recall averaged across all serial positions, separately computed for stimulated items (red), non-stimulated items on stimulated lists (blue), and control lists (green), then averaged across subjects. **B.** Recall probabilities separately computed for primacy (items 1–2) and non-primacy items (items 3–12) in the same way as Panel A. **C.** Change in mean recall probability for stimulated lists versus control lists (position matched), computed relative to stimulation onset. **D.** Probabilities of incorrectly recalling items from different sources (labeled “item type”) while recalling items on a stimulated list. \*:  $p \leq 0.05$ , \*\*:  $p < 0.01$ , † :  $p < 0.1$ . Error bars are SEM.

254 **Effect of Stimulation on Verbal Memory Encoding.** First, we examined whether the memory  
 255 impairment from stimulation lingered after stimulation ended. To do this, we measured recall  
 256 performance for non-stimulated items on stimulated lists, as well as for items on control lists  
 257 (Fig. 2A). We found significant differences across all three conditions (one-way ANOVA;  $F(1, 22) =$   
 258  $3.92, p = 0.020$ ). Recall rates were lower for stimulated items compared to non-stimulated items  
 259 (HSD-corrected post-hoc  $t_{22} = -2.29, p = 0.04$ , paired  $t$  test) and for non-stimulated items on  
 260 stimulated lists relative to items on control lists (HSD-corrected  $t_{22} = -1.73, p = 0.07$ , paired  $t$  test).  
 261 These results indicate that the memory impairment from stimulation persists after the stimulation  
 262 interval, moderately impairing recall rates for items learned right after the stimulator was turned  
 263 off.

264 Electrophysiological studies have suggested that different neural patterns underlie the encoding  
265 of items from early and late positions within an individual list (Serruya et al., 2014; Sederberg et al.,  
266 2006; Manning et al., 2011). To compare the role of the MTL in encoding early versus late items, we  
267 measured the impact of stimulation across the course of each list. We computed recall probabilities  
268 for each stimulation condition separately for primacy (items 1 & 2; see *Methods*) and for non-primacy  
269 items (items 3–12; Fig. 2B). As expected (Murdock, 1962), overall recall probabilities for primacy  
270 items were higher than for non-primacy items. However, the effects of MTL stimulation varied over  
271 the course of the list. To assess this effect, we performed a two-way repeated-measures ANOVA  
272 with factors list position (primacy/non-primacy) and stimulation condition (stim., non-stim. item on  
273 stim. lists, and control lists). We found that MTL stimulation impaired the recall of items more for  
274 primacy than non-primacy positions (ANOVA interaction  $F(1, 44) = 2.78, p = 0.047$ ). We confirmed  
275 that stimulation significantly impaired recall of primacy items (HSD-corrected post-hoc  $t_{22} = -1.95,$   
276  $p = 0.04$ , paired  $t$  test) and that this impairment was not present for non-primacy items ( $p > 0.8, t$   
277 test).

278 As mentioned above, on stimulated lists the stimulator was enabled in a two-on-two-off cycle  
279 across items. To examine how memory performance varied according to the phase of the stimulation  
280 cycle, we compared the effect of stimulation on memory performance in these intervals relative to  
281 position-matched controls (see *Methods*). Memory performance was more strongly impaired for the  
282 second stimulated item compared to the first such item (Fig. 2C;  $t_{22} = -2.10, p = 0.042$ , paired  $t$   
283 test), thus indicating that the impairment of memory from stimulation accumulates gradually or  
284 has a delayed onset.

285 In addition to comparing mean accuracy rates, an additional way to assess the effects of  
286 stimulation on memory is to investigate the types of errors that are made during recall (Darley  
287 & Murdock, 1971). To test whether stimulation influenced the types of recall errors that subjects  
288 made, we examined prior list intrusions (PLIs), defined as recalls of items from the previous list  
289 rather than the current one (Fig. 2D). We found that stimulated items on a previous list had a  
290 lower probability of being the source of a PLI compared to non-stimulated items on a previous list  
291 ( $z = -2.12, p = 0.034, n = 23$ , Signed Rank Test). This finding suggests that when an item is learned  
292 in the presence of MTL stimulation, it is less strongly maintained in memory.

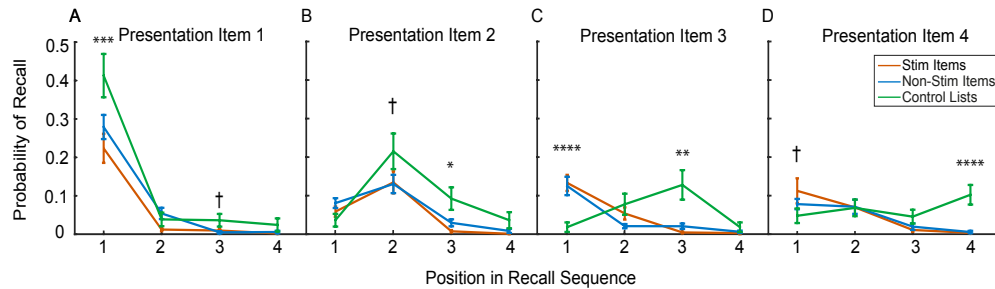

Figure 3: **Effect of MTL stimulation on recall order for the beginning of the list.** Plots show the probability of recall at different recall-output positions. Probabilities were averaged within each subject and then averaged across subjects. Plots from left to right show results separately for items that were presented at positions 1–4. \*:  $p < 0.05$ , \*\*:  $p < 0.01$ , \*\*\*:  $p < 10^{-3}$ , \*\*\*\*:  $p < 10^{-4}$ , †:  $p < 0.1$

293 **Effect of Stimulation on the Temporal Organization of Memory.** We next examined whether  
294 MTL stimulation altered the temporal structure of memory. In a standard delayed free recall task  
295 without stimulation, subjects tend to recall items in the order that they were encoded (Howard &  
296 Kahana, 1999). We hypothesized that stimulation might disrupt this phenomenon. To examine this  
297 issue, we present the results of two separate analyses of the effect of stimulation on the temporal  
298 structure of episodic memory recalls. We begin by examining recall order at the beginning of each  
299 list, followed by a broader analysis of the overall temporal order of responses across the complete  
300 list (Polyn et al., 2009a).

301 To examine the effects of MTL stimulation on recall order, we computed the mean probability  
302 of recalling an item from each list position in each of the first four output positions (Fig. 3). On  
303 control lists, as expected, there was a tendency for items to be recalled in the order they were  
304 viewed. However, MTL stimulation disrupted this pattern, as we show by comparing recall rates  
305 at each position between control and stimulation lists (Figs. 3A–D). Subjects exhibited decreased  
306 probabilities for recalling each of the first four items in their proper orders (items 1, 3, & 4:  $p$ 's < 0.01;  
307 item 2:  $p = 0.078$ ). Notably, when subjects recalled three or more items on a stimulated list, they  
308 most often recalled the third item first. These results indicate that stimulation hindered subjects  
309 from encoding temporal structure during learning.

310 In the free recall task, item recalls tend to be temporally clustered, such that items consecutively  
311 recalled are more often learned from nearby list positions (Howard & Kahana, 2002). We examined  
312 the effect of stimulation on temporal clustering by computing two measures of list-wide temporal

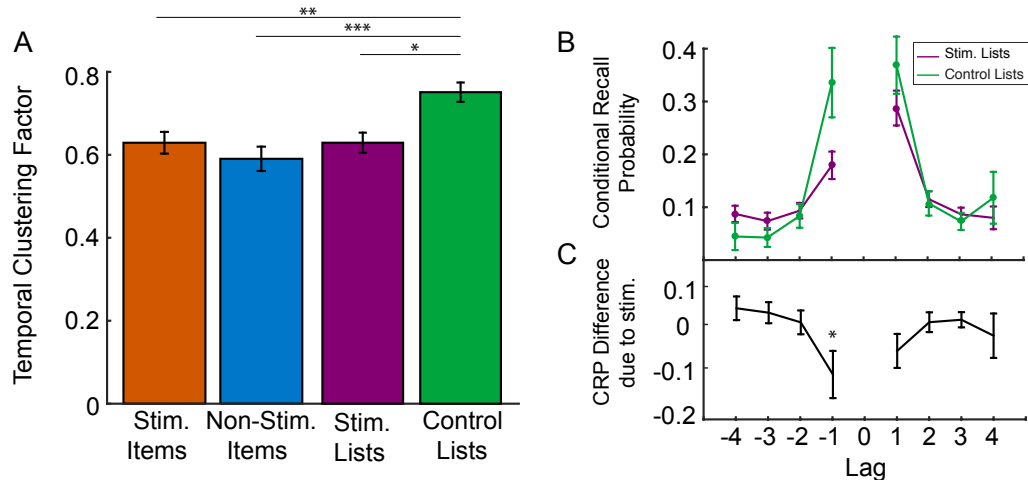

Figure 4: **Analysis of the effect of MTL stimulation on temporal clustering of item recalls.** **A.** Temporal Clustering Factors (TCF) for items from each stimulation condition, averaged across subjects. **B.** Conditional Recall Probability (CRP) plot for control and stimulated lists, averaged across subjects. **C.** Difference in recall probability from stimulation (Stim List – control). \*:  $p < 0.05$ , \*\*:  $p < 0.01$ , \*\*\*:  $p < 10^{-3}$

313 contiguity—the temporal clustering factor (TCF) (Polyn et al., 2009a) and the lag conditional recall  
 314 probability (CRP) function (Kahana, 1996)—and testing if they changed with MTL stimulation  
 315 (Fig. 4A). TCFs, which measure the correlation between item ordering during encoding and recall,  
 316 were higher for control lists compared to conditions with stimulation ( $p$ 's  $< 0.05$ , rank-sum tests).  
 317 Despite the theoretical insensitivity of the TCF to recall counts (Polyn et al., 2009a), to rule out the  
 318 possibility that the temporal factor was lowered by the diminished recall rates on stimulated lists,  
 319 we reperformed this analysis after matching recall counts between control and stimulated lists with  
 320 random subsampling. However, this analysis replicated the same pattern of results ( $p$ 's  $< 0.02$ ),  
 321 confirming our original interpretation that stimulation specifically impaired temporal clustering in  
 322 addition to diminishing the mean recall rate.

323 To visualize the effect of MTL stimulation on the dynamics of memory, we computed the lag-CRP  
 324 for each list condition. Overall, both stimulated and control lists show higher recall probabilities at  
 325 short lags, as expected (Kahana, 1996). However, CRPs for stimulated lists were flatter than for  
 326 control lists (Figure 4B). In particular, with stimulation there was a significant decrease in recall  
 327 probability for item transitions at lag=-1 ( $p = 0.032$ , rank-sum test; Fig. 4C). These results support  
 328 the notion that MTL stimulation disrupts the temporal organization of memory, by decreasing  
 329 subjects' tendencies both to recall items in their viewed order and to make temporally contiguous

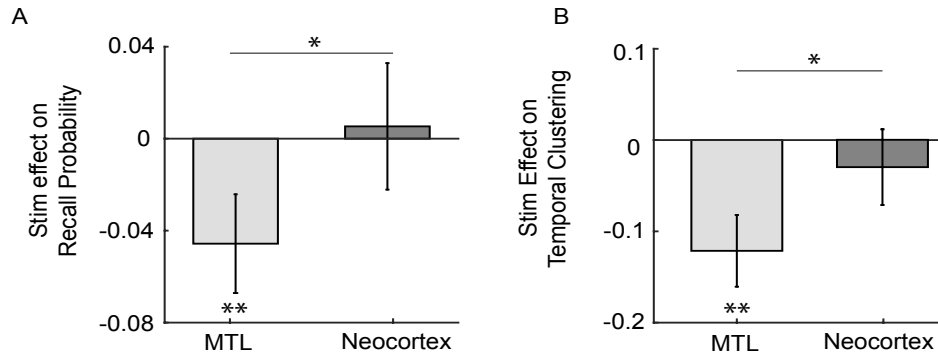

Figure 5: **Comparison of effects of stimulation in different regions during free recall.** **A.** Change in recall probability due to stimulation (stimulated lists - control lists). This measure was separately computed for stimulation that was applied in hippocampus/entorhinal cortex (labeled “MTL”) or in neocortex. **B.** Change in temporal clustering factor (stimulated lists - control lists) due to stimulation applied to MTL and neocortex regions. \*:  $p < 0.05$ , \*\*:  $p < 0.01$

330 recalls.

331 An unexpected feature of our data was that the CRPs for control lists were rather symmetric, as  
332 opposed to showing a moderate asymmetry (Kahana, 1996). To explain this pattern, we separately  
333 examined CRPs for items from different list positions. The CRP for the first half of each list showed  
334 a normal forward asymmetry for both control and stimulated lists, and a significantly lowered  
335 recall probability at lag=-1 for stimulated compared to control lists ( $p < 0.05$ , rank sum test). In  
336 contrast, the CRP for the second half of the list was symmetric and showed no significant differences  
337 between stimulation and control conditions ( $p > 0.1$ ). Thus, the symmetry of the aggregate CRP  
338 was caused by recalls in the second half of lists deviating from expected patterns.

339 **Stimulation outside the MTL.** To compare whether the memory modulation patterns we observed  
340 were specific to stimulation in the MTL, we compared recall performance between sessions  
341 where stimulation was applied in MTL regions (hippocampus and entorhinal cortex) versus  
342 stimulation outside the MTL (neocortex). Recapitulating past results (Jacobs et al., 2016), neocortical  
343 stimulation did not significantly impair recall rates compared to control lists (Fig. 5A;  $p > 0.1$ ,  
344 one-sample  $t$  test). This effect was significantly different compared to the effect of MTL stimulation  
345 ( $t_{31} = -1.76, p = 0.044$ , unpaired  $t$  test). Within the neocortex group, stimulation electrodes were  
346 placed in different subregions across subjects (see *Methods*). However, we did not observe significant  
347 differences in the effects of stimulation between these subregions (one-way ANOVA,  $F(2) = 0.73$ ,

348  $p = 0.52$ ). There was also no significant effect of neocortical stimulation on temporal clustering  
349 (Fig. 5B). Thus, at least with the type of stimulation we used, stimulation's ability to disrupt the  
350 temporal organization of memory is specific to MTL sites and is not a brain-wide phenomenon.  
351 Finally, we note that these regional differences were not a result of differing sample sizes between  
352 MTL and neocortex, because we found the same pattern of results after reperforming this analysis  
353 with sample sizes matched using random subsampling (see *Methods*).

## 354 **Spatial Memory**

355 Our spatial memory task tested subjects' ability to remember the locations where items had been  
356 observed in a virtual reality environment. We began our analyses by examining overall task  
357 performance, as measured by our memory score (MS) measure, for subjects with stimulation  
358 electrodes in the MTL. Patients showed a range of mean memory scores, ranging from 0.51 to  
359 0.95. Visually, the distribution of memory scores appeared to comprise more than one performance  
360 group (Fig. 6A). We determined quantitatively that splitting our subject population into two  
361 groups provided the best fit for this performance distribution using the  $k$ -means gap statistic  
362 (Tibshirani et al., 2001). Thus split our subjects into two performance groups—"good-performers"  
363 and "bad-performers"—using a threshold of  $MS=0.75$ .

364 We were interested in understanding the source of this performance difference. Prior work  
365 suggests that boundaries, in particular, are an important influence on spatial navigation and  
366 memory (Hartley et al., 2004; S. A. Lee, 2017; Chan et al., 2012). Furthermore, data from subjects  
367 performing this same task without stimulation showed differences in both memory performance  
368 and neural signals near boundaries (S. A. Lee et al., 2018). This body of earlier work motivated us  
369 to consider that one way the two performance groups could be distinguished is by their behavior  
370 in relation to boundaries. Thus, our subsequent analyses separately considered boundary trials  
371 and interior trials for each of the two subject performance groups.

372 **Assessing spatial memory strategies.** We hypothesized that part of the reason that the good-  
373 performers in our task show improved performance is because they were more effective at utilizing  
374 visual information from nearby boundaries to assist with encoding object locations. We tested this by  
375 using an ANOVA to examine the effects of object location (boundary/interior, a repeated measure),



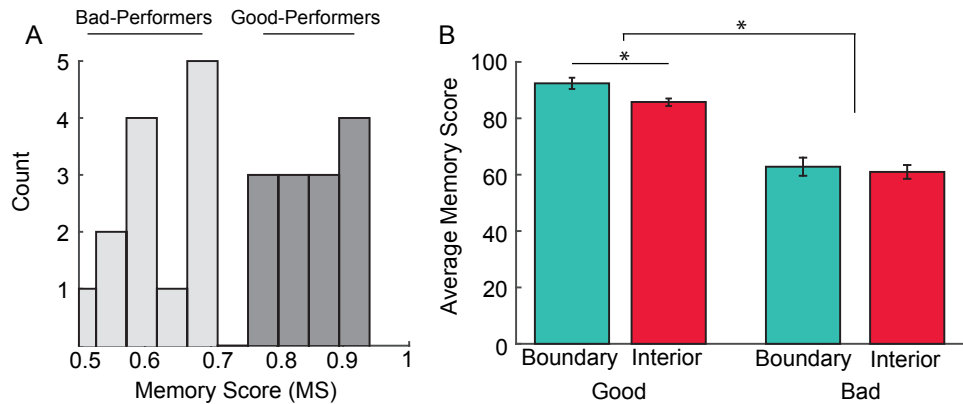

Figure 6: **Behavioral analysis of memory performance in the spatial memory task without MTL stimulation.** **A.** Histogram of memory scores across subjects with electrodes in the MTL. **B.** Average memory score for good- and bad-performing subjects, separately computed for remembered locations near and far from boundaries, then averaged across subjects. \*:  $p < 0.05$

376 subject condition group, and their interaction on memory score for trials without stimulation  
377 (Fig. 6B). Although this analysis showed that MS did not vary significantly with object location as a  
378 main factor ( $F(1, 22) = 2.16, p = 0.15$ ), there was a significant interaction between subject group (i.e.,  
379 good or bad) and object location ( $F(1, 22) = 4.21, p = 0.018$ ). This indicated that good-performers  
380 showed significantly better memory performance near boundaries compared to bad-performers.  
381 Post-hoc tests confirmed that good- but not bad-performing subjects showed significantly greater  
382 MS for items located near boundaries (HSD-corrected post-hoc tests: good-performers,  $p = 0.047$ ;  
383 bad-performers,  $p = 0.93$ ).

384 We confirmed that this pattern was robust by analyzing a separate dataset of 69 subjects who  
385 performed the same task without stimulation (S. A. Lee et al., 2018). Here we again found that  
386 good-performers showed a significantly larger improvement in MS near boundaries than bad-  
387 performers (interaction  $F(1, 67) = 4.94, p = 0.028$ , two-way ANOVA), and that only good-performers  
388 demonstrated boundary-related performance improvements (post-hoc tests: good-performers  
389  $p = 0.032$ ; bad-performers  $p = 0.99$ ). This replication of the findings from our main dataset supports  
390 the view that good-performing subjects exhibit improved memory performance when remembering  
391 locations near boundaries in this task.

392 The finding that one group of subjects showed increased memory performance for remembering  
393 locations near boundaries indicated to us that it was possible that these subjects varied their memory

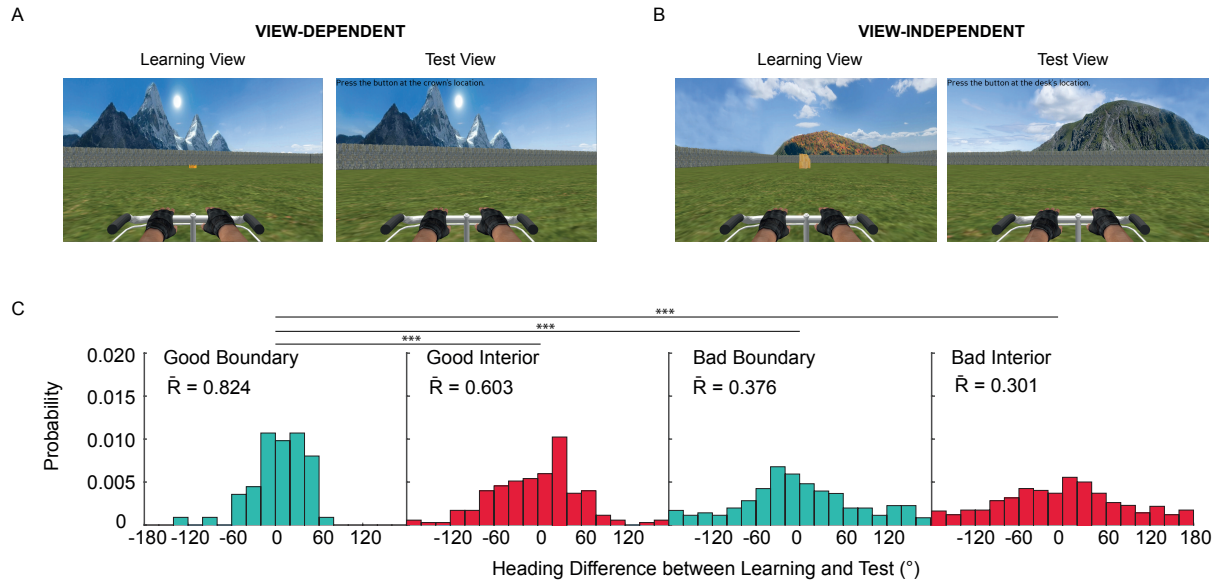

Figure 7: **Analysis of navigational representations used by subjects independent of MTL stimulation** **A.** First-person visualization of a subject utilizing visual boundary-based cuing on a trial where they remembered a location near a boundary. **B.** Same, but for a trial where the subject does not utilize visual-boundary-based cuing on a trial where they remembered a location near the interior. **C.** Probability density functions of differences in headings between learning and test trials. Length of resultant vector ( $\bar{R}$ ) for the differences between learning and test headings for each category are also indicated. Large values imply significant clustering about 0. Heading differences were averaged across subjects in each category. \*\*\*:  $p < 0.001$

394 strategy for objects in different locations. We hypothesized that the subjects who showed increased  
395 memory performance for objects near boundaries employed a strategy in which they attended  
396 to visual-boundary cues during encoding and made use of those same environmental features to  
397 guide retrieval. Figure 7A presents a visualization of how this type of “visual-boundary-based”  
398 cuing could occur in this task. This technique would be more effective when subjects are near  
399 boundaries because the increased size of visual cues make them more salient. By contrast, Figure  
400 7B depicts a “visual-boundary-agnostic” representation, in which subjects remember each location  
401 based on a global sense of their position relative to the environment. This type of representation  
402 would likely be equally useful for remembering locations both near and far from boundaries.

403 Based on our finding that only good-performers showed better memory performance when  
404 remembering objects near boundaries (Fig. 6B), we hypothesized that good spatial encoding of  
405 boundary locations is likely to involve, at least in part, the use of visual-boundary-based scene  
406 representations. To test this hypothesis, we estimated the spatial representation used on each trial

407 by measuring the difference between each subject's heading at the end of learning and test (see  
408 *Methods*). We computed the distribution of learning–test heading differences separately for the  
409 interior and boundary regions of the environment, as well as for good- and bad-performers. If  
410 a subject had a similar heading between learning and test on a given trial, it indicates that they  
411 matched visual scene information between encoding and recall. Consistent with our predictions,  
412 good-performing subjects near boundaries showed more similar headings between learning and test  
413 compared to other memory conditions (Fig. 7C; pairwise  $k$  tests, all  $p$ 's < 0.001). This result supports  
414 our hypothesis that good-performing subjects were more likely to utilize visual-boundary-based  
415 representations to assist with remembering objects near boundaries.

416 Objects located in the interior of the environment can easily be approached from any direction,  
417 whereas objects near boundaries are most often approached by driving from the center of the  
418 environment. To ensure that this aspect of the task design did not influence our results, we  
419 conducted a simulation of the mean learning–test heading differences that would be expected  
420 by chance (see *Methods*). The heading differences for good-performers near boundaries in our  
421 data were strongly clustered near zero with a mean resultant vector length  $\bar{R}$  of 0.82 (Fig. 7C).  
422 This mean resultant vector length was well outside the range of  $\bar{R}$  values that we observed in our  
423 randomized simulations ( $p < 0.01$ ; simulated  $\bar{R}$  range 0.23–0.62), indicating that the learning–test  
424 heading similarities for boundary items were not artifacts of the task design.

425 **Effect of Stimulation.** Overall, performance in the spatial memory task decreased with MTL  
426 stimulation (Jacobs et al., 2016). Given our results indicating that good-performing subjects use  
427 different memory strategies near boundaries, we assessed the effects of MTL stimulation on memory  
428 score for each subject performance group and environment area using a two-way ANOVA (Fig. 8A).  
429 This analysis showed that stimulation's effect on MS was modulated significantly by performance  
430 group ( $F(1, 24) = 8.33, p < 0.01$ ) and by object location ( $F(1, 24) = 4.55, p = 0.038$ ). Thus, MTL  
431 stimulation impaired performance more in the interior of the environment and more for good-  
432 performing subjects. A post-hoc test confirmed that the memory impairment from stimulation was  
433 statistically significant for good-performing subjects in the interior of the environment ( $p = 0.010$ ,  
434 one-sample  $t$  test, Bonferroni-corrected  $\alpha_{crit} = 0.016$ ).

435 Figure 8B illustrates our pattern of results more fully by plotting the relation between each

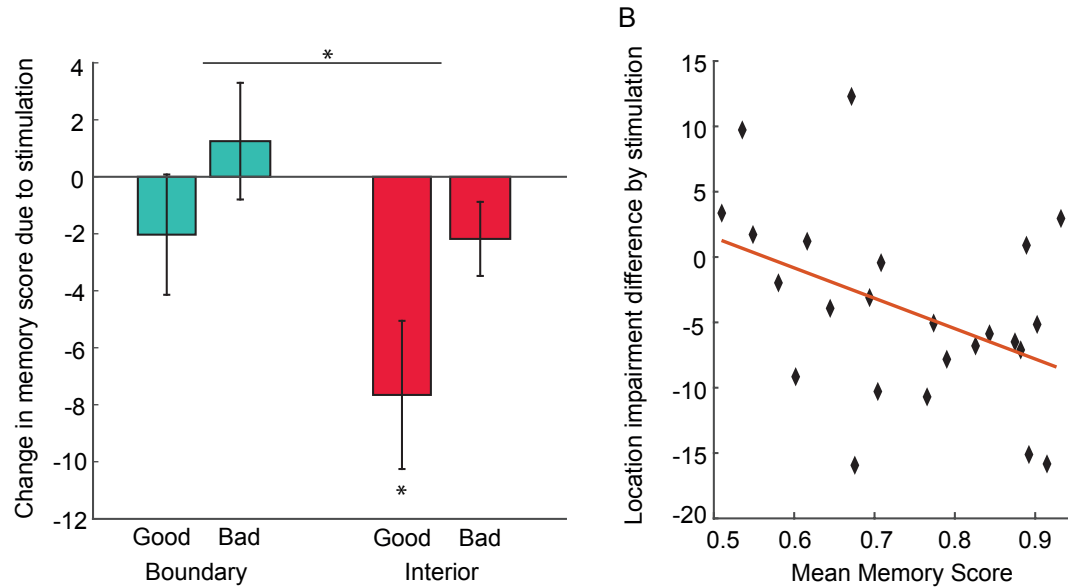

Figure 8: **Analysis of effect of MTL stimulation on memory for objects from different locations.** **A.** Difference in memory score ( $\times 100$ ) due to MTL stimulation for different object locations and subject types. Negative values indicate impairment from stimulation. Impairments were first averaged across trials and then across subjects. \*:  $p < 0.05$ , † :  $p < 0.1$  **B.** Scatter plot for individual subjects of the differences in memory score between stimulated and non-stimulated and between boundary and interior trials. Each point represents by how much stimulation impairs boundary trials more than interior trials. A negative value indicates increased impairment for interior trials. Line represents best-fit trend line from linear regression.

436 subject's mean memory score and the differential effect of stimulation on their mean memory score  
437 for boundary versus interior trials. There is a significant negative relation between these two  
438 variables ( $t_{24} = -2.21, p = 0.038$ , one-sample  $t$  test), which indicates that, with increasing subject  
439 performance, stimulation caused greater memory impairment for items near the interior of the  
440 environment. These results indicate that visual-boundary-agnostic representations, which subjects  
441 likely use to remember items in the environment's interior, were specifically impaired by MTL  
442 stimulation.

443 Comparing the effects of MTL stimulation on memory performance between the spatial and  
444 verbal tasks, we found a weakly positive but non-significant correlation across subjects ( $\rho = 0.19$ ,  
445  $p = 0.65$ ). However, this analysis may be underpowered because only eight subjects contributed to  
446 this comparison.

## 447 Discussion

448 By identifying the nature of the changes in memory performance that related to direct electrical brain  
449 stimulation, we have provided causal evidence to suggest that the human MTL supports the encoding  
450 of memories according to their spatial and temporal features. This bolsters our understanding of  
451 the specific cognitive processes implemented by the MTL to allow humans to maintain a framework  
452 of when and where past events occurred. By using temporally restricted methods to causally  
453 identify the means by which the MTL maintains episodic memory representations, our results  
454 provide strong evidence that is consistent with findings from previous lesion (Bohbot et al., 1998,  
455 2004; Kolarik et al., 2017; Spiers, Maguire, & Burgess, 2001; Spiers, Burgess, Maguire, et al., 2001),  
456 imaging (Copara et al., 2014; Suthana et al., 2009; Staresina & Davachi, 2009) and intracranial EEG  
457 studies (Watrous et al., 2013; Ekstrom & Bookheimer, 2007; Miller et al., 2013; Howard et al., 2012;  
458 Foster et al., 2013).

459 Theoretical models have suggested that the MTL plays a role in supporting episodic memory  
460 coding with place cells and time cells (Howard & Eichenbaum, 2015). Place cells activate to encode  
461 an animal's presence at a specific location in a given environment, representing that location in  
462 an allocentric manner relative to the overall constellation of the environment's spatial geometry  
463 (O'Keefe & Nadel, 1978). Analogously, time cells activate at particular moments in temporally  
464 structured intervals, relative to the overall scaling of the event sequence (Eichenbaum, 2014). Based  
465 on the properties of place and time cells, it suggested that the role of the MTL, and specifically the  
466 hippocampus, in memory is to represent the overall spatiotemporal context for memory coding  
467 (Squire et al., 2004; Howard & Eichenbaum, 2015; Ekstrom & Ranganath, 2017). Our findings  
468 indicate that MTL place and time cells could be closely involved in the encoding of spatial and  
469 temporal memories (Miller et al., 2013), as the nature of the memory impairments we observed  
470 from stimulation is what would be expected if place- and time-cell representations were disrupted.

471 Notably, specific features of time cells correspond to aspects of our verbal memory findings. In  
472 rodents, the time cells that represent early moments in an interval each have shorter activations  
473 compared with those that represent later moments (MacDonald et al., 2011). As a result, the  
474 hippocampal population representation of temporal context evolves more rapidly at the beginning  
475 of a given interval (Howard et al., 2015). This phenomenon could relate to our finding that the

476 disruptive effect of stimulation was stronger for primacy items. MTL stimulation may be more  
477 disruptive at the beginning of each list if the temporal context representations in this interval were  
478 more transient, or fragile, perhaps owing to the shorter-lived responses of the underlying time cells.

479 It is important theoretically to note that stimulation caused decreased temporal clustering  
480 (Figure 4), as evidenced by a flattened lag-CRP curve for items learned while the stimulator was  
481 active. The clustering of item recalls based on the times when they were encoded is a key element  
482 of retrieved-context models of episodic memory (Howard & Kahana, 1999); our results therefore  
483 support these models generally and indicate that the MTL has a key functional role in the neural  
484 instantiation and encoding of episodic contexts (Howard et al., 2005). Notably, stimulation in our  
485 task occurred during encoding whereas the item clustering changes we measured were during  
486 recall. Thus our findings causally show that clustering of recalls is, at least in part, a result of neural  
487 signals during encoding, perhaps due to the construction of associations from each viewed item to  
488 the current temporal context represented by time cells.

489 Analogous to how stimulation disrupts encoding of memory representations that may rely on  
490 MTL time cells, our data from the spatial task indicates that MTL stimulation could also disrupt  
491 the encoding of items that may rely on place and grid cells. Because the encoding of items in the  
492 interior of the environment was more strongly disrupted by stimulation, it suggests that encoding  
493 these locations was more directly supported by the MTL. Our finding that MTL stimulation does  
494 not significantly interfere with memories of objects located near boundaries does not necessarily  
495 indicate that the MTL has no role in the encoding of items near boundaries—indeed, MTL boundary  
496 cells provide input to place cells (Barry et al., 2006). Together these findings suggest that non-MTL  
497 structures can support view-based memory strategies, facilitating the encoding of certain types of  
498 memory items independently of the MTL. Consistent with this interpretation, there is evidence  
499 from fMRI studies that spatial scene recognition is mediated by both MTL and non-MTL structures,  
500 such as the striatum, parahippocampal place area, retrosplenial cortex, and occipital place area  
501 (Epstein et al., 2007; Park & Chun, 2009; Park et al., 2011; Julian et al., 2016; Doeller et al., 2008).  
502 Furthermore, it has also been directly shown that subjects with MTL damage have intact scene  
503 recognition abilities (Spiers, Burgess, Hartley, et al., 2001). These findings support our view that  
504 even when the MTL was impaired by stimulation, performance was relatively unaffected on  
505 boundary trials because extra-MTL areas were able to compensate for the deficit. Further support

506 for this claim would arise from using a paradigm with manipulations to directly identify allocentric  
507 spatial representations, rather than our approach of inferring strategy based on mean behavior.

508 A potentially surprising feature of our results is that, in the spatial task, good- but not bad-  
509 performing subjects exhibited differential memory performance according to the location of an  
510 object. This emphasizes that strategy selection may be an important element of memory, for  
511 settings where multiple memory systems could potentially accomplish a task (Doll et al., 2014;  
512 Squire, 1992; Iaria et al., 2003). Because we found a correlation between subject mean performance  
513 and the tendency for stimulation to impair memory encoding far from boundaries, it suggests  
514 that good-performers were more likely to alter their spatial memory strategy depending on the  
515 object's location relative to the boundaries. This indicates that these subjects preferentially utilized  
516 MTL-based strategies in the interior of the environment while recruiting extra-MTL brain areas for  
517 objects near boundaries to support visual-boundary-based encoding.

518 Our primary result is showing that the MTL is responsible for encoding the spatial and temporal  
519 structure of particular types of episodic memories. By employing causal and temporally reversible  
520 methods, we provide perhaps the strongest evidence yet for this claim. In addition to being  
521 important for our fundamental understanding of brain function and memory systems, our results  
522 have implications for guiding the future use of brain stimulation for cognitive enhancement.

523 Memory includes a diverse range of cognitive and neural processes. Our findings suggest  
524 that to develop brain stimulators for memory enhancement, it might be useful to tune these  
525 devices to a specific memory strategy or behavioral process. Neuromodulation in the MTL may be  
526 particularly useful for modulating memories, based on the activity of hippocampal place and time  
527 cells. Nonetheless it may still be possible that other types of neocortical stimulation could be used to  
528 modulate memory. Several types of studies have demonstrated a role for the neocortex in episodic  
529 memory, including studies with lesions (Duarte et al., 2010), direct lateral-temporal stimulation  
530 (Ezzyat et al., 2018; Kucewicz et al., 2018), and transcranial magnetic stimulation (J. X. Wang et al.,  
531 2014). Thus, probing the effects of neocortical stimulation is likely to be a focus of much future work,  
532 as it is possible that our low sample size in these regions led us to underestimate its therapeutic  
533 potential. One approach that could be useful for such enhancement is to utilize a closed-loop  
534 approach to stimulation by measuring ongoing neuronal activity in real-time and dynamically  
535 varying the nature of the stimulation that will be applied (Ezzyat et al., 2017, 2018). Given the

536 complexity of human memory and cognition, this type of dynamic approach would be useful by  
537 allowing stimulation to vary according to instantaneous internal neural states as well as external  
538 environmental demands.



## 539 **References**

- 540 Avants, B. B., Epstein, C. L., Grossman, M., & Gee, J. C. (2008). Symmetric diffeomorphic  
541 image registration with cross-correlation: evaluating automated labeling of elderly and  
542 neurodegenerative brain. *Medical Image Analysis, 12*(1), 26–41.
- 543 Barry, C., Lever, C., Hayman, R., Hartley, T., Burton, S., O’Keefe, J., . . . Burgess, N. (2006). The  
544 boundary vector cell model of place cell firing and spatial memory. *Rev Neurosci, 17*(1-2),  
545 71–97.
- 546 Berens, P. (2009). Circstat: A matlab toolbox for circular statistics. *Journal of Statistical Software,*  
547 *31*(10).
- 548 Bohbot, V., Iaria, G., & Petrides, M. (2004). Hippocampal function and spatial memory: evidence  
549 from functional neuroimaging in healthy participants and performance of patients with  
550 medial temporal lobe resections. *Neuropsychology, 18*(3), 418-25.
- 551 Bohbot, V., Kalina, M., Stepankova, K., Spackova, N., Petrides, M., & Nadel, L. (1998). Spatial memory  
552 deficits in patients with lesions to the right hippocampus and to the right parahippocampal  
553 cortex. *Neuropsychologia, 36*(11), 1217–38.
- 554 Chan, E., Baumann, O., Bellgrove, A., Mark, & Mattingley, B., Jason. (2012). From objects to  
555 landmarks: the function of visual location information in spatial navigation. *Frontiers in*  
556 *Psychology, 3*(304).
- 557 Cohen, N. J., & Eichenbaum, H. (1993). *Memory, amnesia, and the hippocampal system*. Cambridge,  
558 MA: MIT.
- 559 Copara, M. S., Hassan, A., Kyle, C. T., Libby, L., Ranganath, C., & Ekstrom, A. D. (2014).  
560 Complementary roles of human hippocampal subregions during retrieval of spatiotemporal  
561 context. *Journal of Neuroscience, 34*(20).
- 562 Craik, F. I. M. (1970). The fate of primary memory items in free recall. *Journal of Verbal Learning and*  
563 *Verbal Behavior, 9*, 658-664.
- 564 Darley, C. F., & Murdock, B. B. (1971). Effects of prior free recall testing on final recall and recognition.  
565 *Journal of Experimental Psychology, 91*, 66-73.
- 566 Doeller, C. F., King, J. A., & Burgess, N. (2008). Parallel striatal and hippocampal systems for  
567 landmarks and boundaries in spatial memory. *Proceedings of the National Academy of Sciences,*

- 568 USA, 105(15), 5915–5920.
- 569 Doll, B., Shohamy, D., & Daw, N. (2014). Multiple memory systems as substrates for multiple  
570 decision systems. *Neurobiology of learning and memory*.
- 571 Douglas, D., Thavabalasingham, S., Chorghay, Z., O’Neil, E. B., Barense, M. D., & Lee, A. C. H.  
572 (2016). Perception of impossible scenes reveals differential hippocampal and parahippocampal  
573 place area contributions to spatial coherency. *Hippocampus*, 27(1).
- 574 Duarte, A., Henson, R., Knight, R. T., Emery, T., & Graham, K. S. (2010). The orbitofrontal cortex is  
575 necessary for temporal context memory. *Journal of Cognitive Neuroscience*, 22(8), 1819-1831.
- 576 Eichenbaum, H. (2004, Sep). Hippocampus: cognitive processes and neural representations that  
577 underlie declarative memory. *Neuron*, 44(1), 109–120. Retrieved from [http://dx.doi.org/](http://dx.doi.org/10.1016/j.neuron.2004.08.028)  
578 [10.1016/j.neuron.2004.08.028](http://dx.doi.org/10.1016/j.neuron.2004.08.028) doi: 10.1016/j.neuron.2004.08.028
- 579 Eichenbaum, H. (2014). Time cells in the hippocampus: a new dimension for mapping memories.  
580 *Nature Reviews Neuroscience*, 15(11), 732–744.
- 581 Ekstrom, A. D., & Bookheimer, S. Y. (2007). Spatial and temporal episodic memory retrieval recruit  
582 dissociable functional networks in the human brain. *Learning & Memory*.
- 583 Ekstrom, A. D., Copara, M. S., Isham, E. A., Wang, W., & Yonelinas, A. P. (2011). Dissociable networks  
584 involved in spatial and temporal order source retrieval. *NeuroImage*, 56(3), 1803–1813.
- 585 Ekstrom, A. D., & Ranganath, C. (2017). Space, time and episodic memory: the hippocampus is all  
586 over the cognitive map. *Hippocampus*.
- 587 Epstein, R. A., Parker, W., & Feiler, A. (2007). Where am I now? Distinct roles for parahippocampal  
588 and retrosplenial cortices in place recognition. *Journal of Neuroscience*, 27(23), 6141.
- 589 Ezzyat, Y., Kragel, J. E., Burke, J. F., Levy, D. F., Lyalenko, A., Wanda, P., . . . Kahana, M. J. (2017).  
590 Direct brain stimulation modulates encoding states and memory performance in humans.  
591 *Current Biology*, 27, 1-8.
- 592 Ezzyat, Y., Wanda, P., Levy, D., Kadel, A., Aka, A., Pedisich, I., . . . Kahana, M. (2018). Closed-loop  
593 stimulation of temporal cortex rescues functional networks and improves memory. *Nature*  
594 *Communications*, 9(365). doi: 10.1038/s41467-017-02753-0
- 595 Fischler, I., Rundus, D., & Atkinson, R. C. (1970). Effects of overt rehearsal procedures on free recall.  
596 *Psychonomic Science*, 19(4), 249 - 250.
- 597 Foster, B. L., Kaveh, A., Dastjerdi, M., Miller, K. J., & Parvizi, J. (2013). Human retrosplenial cortex

598 displays transient theta phase locking with medial temporal cortex prior to activation during  
599 autobiographical memory retrieval. *The Journal of Neuroscience*, 33(25), 10439–10446.

600 Friston, K. J., Glaser, D., Henson, R. N. A., Kiebel, S., Phillips, C., & Ashburner, J. (2002). Classical  
601 and bayesian inference in neuroimaging: applications. *NeuroImage*, 16.

602 Guderian, S., Dzieciol, A. M., Gadian, D. G., Jentschke, S., Doeller, C. F., Burgess, N., . . . Vargha-  
603 Khadem, F. (2015). Hippocampal volume reduction in humans predicts impaired allocentric  
604 spatial memory in virtual-reality navigation. *Journal of Neuroscience*, 35(42).

605 Hartley, T., Trinkler, I., & Burgess, N. (2004). Geometric determinants of human spatial memory.  
606 *Cognition*, 94, 39–75.

607 Henson, R. (2005). A mini-review of fmri studies of human medial temporal lobe activity associated  
608 with recognition memory. *The Quarterly Journal of Experimental Psychology*, 58(3-4).

609 Howard, M. W., & Eichenbaum, H. (2015). Time and space in the hippocampus. *Brain Research*.

610 Howard, M. W., Fotedar, M. S., Datey, A. V., & Hasselmo, M. E. (2005). The temporal context  
611 model in spatial navigation and relational learning: Toward a common explanation of medial  
612 temporal lobe function across domains. *Psychological Review*, 112(1), 75–116.

613 Howard, M. W., & Kahana, M. J. (1999). Contextual variability and serial position effects in free  
614 recall. *Journal of Experimental Psychology: Learning, Memory, and Cognition*, 25(4), 923–941. doi:  
615 10.1037/0278-7393.25.4.923

616 Howard, M. W., & Kahana, M. J. (2002). A distributed representation of temporal context. *Journal of*  
617 *Mathematical Psychology*, 46(3), 269–99.

618 Howard, M. W., Shankar, K. H., Aue, W. R., & Criss, A. H. (2015). A distributed representation of  
619 internal time. *Psychological Review*, 122(1), 24–53. doi: 10.1037/a0037840

620 Howard, M. W., Viskontas, I. V., Shankar, K. H., & Fried, I. (2012). Ensembles of human MTL  
621 neurons “jump back in time” in response to a repeated stimulus. *Hippocampus*, 22, 1833–1847.

622 Iaria, G., Petrides, M., Dagher, A., Pike, B., & Bohbot, V. (2003). Cognitive strategies dependent on  
623 the Hippocampus and Caudate Nucleus in human navigation: Variability and change with  
624 practice. *Journal of Neuroscience*, 23(13), 5945–5952.

625 Jacobs, J., Miller, J., Lee, S. A., Coffey, T., Watrous, A. J., Sperling, M. R., . . . Rizzuto, D. S. (2016,  
626 December). Direct electrical stimulation of the human entorhinal region and hippocampus  
627 impairs memory. *Neuron*, 92(5), 1–8.

- 628 Julian, J. B., Hamilton, R. H., & Epstein, R. A. (2016). The occipital place area is causally involved in  
629 representing environmental boundaries during navigation. *Current Biology*, 26, 1104-1109.
- 630 Kahana, M. J. (1996). Associative retrieval processes in free recall. *Memory & Cognition*, 24(1),  
631 103–109.
- 632 Kahana, M. J. (2012). *Foundations of human memory*. New York, NY: Oxford University Press.
- 633 Klomjai, W., Katz, R., & Lackmy-Valee, A. (2015). Basic principles of transcranial magnetic  
634 stimulation (tms) and repetitive tms (rtms). *Annals of Physical and Rehabilitation Medicine*, 58(4),  
635 208-213.
- 636 Knotkova, H., & Rasche, D. (2014). *Textbook of neuromodulation: Principles, methods, and clinical*  
637 *applications*. Springer Science & Business Media.
- 638 Kolarik, B. S., Baer, T., Shahlaie, K., Yonelinas, A. P., & Ekstrom, A. D. (2017). Close but no cigar:  
639 spatial precision deficits following medial temporal lobe lesions provide novel insight into  
640 theoretical models of navigation and memory. *Hippocampus*.
- 641 Kucewicz, M. T., Berry, B., Miller, L., Khadjevand, F., Ezzyat, Y., Stein, J., . . . Worrell, G. (2018).  
642 Evidence for verbal memory enhancement with electrical brain stimulation in the lateral  
643 temporal cortex. *Brain*. doi: 10.1093/brain/awx373
- 644 Lee, S. A. (2017). The boundary-based view of spatial cognition: a synthesis. *Current Opinion in*  
645 *Behavioral Sciences*, 16, 58-65.
- 646 Lee, S. A., Miller, J. F., Watrous, A. J., Sperling, M., Sharan, A., Worrell, G. A., . . . others (2018).  
647 Electrophysiological signatures of spatial boundaries in the human subiculum. *Journal of*  
648 *Neuroscience*, 218040.
- 649 Lee, S. H., & Dan, Y. (2012). Neuromodulation of brain states. *Neuron*, 76(1), 209-222.
- 650 MacDonald, C., Lepage, K., Eden, U., & Eichenbaum, H. (2011). Hippocampal “time cells” bridge  
651 the gap in memory for discontinuous events. *Neuron*, 71(4), 737–749.
- 652 Maguire, E. A., Intraub, H., & Mullally, S. L. (2015). Scenes, spaces, and memory traces. what does  
653 the hippocampus do? *The Neuroscientist*, 22(5).
- 654 Manning, J. R., Polyn, S. M., Baltuch, G., Litt, B., & Kahana, M. J. (2011). Oscillatory patterns in  
655 temporal lobe reveal context reinstatement during memory search. *Proceedings of the National*  
656 *Academy of Sciences, USA*, 108(31), 12893–12897. doi: 10.1073/pnas.1015174108
- 657 Miller, J. F., Neufang, M., Solway, A., Brandt, A., Trippel, M., Mader, I., . . . Schulze-Bonhage,

- 658 A. (2013). Neural activity in human hippocampal formation reveals the spatial context of  
659 retrieved memories. *Science*, 342(6162), 1111-1114.
- 660 Morris, R. (1984). Developments of a water-maze procedure for studying spatial learning in the rat.  
661 *Journal of Neuroscience Methods*, 11(1), 47–60.
- 662 Murdock, B. B. (1962). The serial position effect of free recall. *Journal of Experimental Psychology*, 64,  
663 482-488. doi: 10.1037/h0045106
- 664 O'Keefe, J., & Dostrovsky, J. (1971). The hippocampus as a spatial map: Preliminary evidence from  
665 unit activity in the freely-moving rat. *Brain Research*, 34, 171–175.
- 666 O'Keefe, J., & Nadel, L. (1978). *The hippocampus as a cognitive map*. New York: Oxford University  
667 Press.
- 668 Park, S., Brady, T., Greene, M., & Oliva, A. (2011). Disentangling scene content from spatial  
669 boundary: Complementary roles for the parahippocampal place area and lateral occipital  
670 complex in representing real-world scenes. *Journal of Neuroscience*, 31, 1333–1340.
- 671 Park, S., & Chun, M. M. (2009). Different roles of the parahippocampal place area (ppa) and  
672 retrosplenial cortex (rsc) in panoramic scene perception. *NeuroImage*, 47(4), 1747 - 1756.
- 673 Polyn, S. M., Norman, K. A., & Kahana, M. J. (2009a). A context maintenance and retrieval  
674 model of organizational processes in free recall. *Psychological Review*, 116, 129-156. doi:  
675 10.1037/a0014420
- 676 Polyn, S. M., Norman, K. A., & Kahana, M. J. (2009b). Task context and organization in free recall.  
677 *Neuropsychologia*, 47, 2158-2163. doi: 10.1016/j.neuropsychologia.2009.02.013
- 678 Ramsey, J., S.J., H., C., H., Halchenko, Y. O., Poldrack, R. A., & Glymour, C. (2010). Six problems for  
679 causal inference from fmri. *NeuroImage*, 49(2).
- 680 Rorden, C., & Karnath, H.-O. (2004). Using human brain lesions to infer function: a relic from a  
681 past era in the fmri age? *Nature Reviews Neuroscience*.
- 682 Scoville, W. B., & Milner, B. (1957). Loss of recent memory after bilateral hippocampal lesions.  
683 *Journal of Neurology, Neurosurgery, and Psychiatry*, 20, 11-21.
- 684 Sederberg, P. B., Gauthier, L. V., Terushkin, V., Miller, J. F., Barnathan, J. A., & Kahana, M. J. (2006).  
685 Oscillatory correlates of the primacy effect in episodic memory. *NeuroImage*, 32(3), 1422–1431.  
686 doi: 10.1016/j.neuroimage.2006.04.223
- 687 Sederberg, P. B., Kahana, M. J., Howard, M. W., Donner, E. J., & Madsen, J. R. (2003). Theta and

- 688        gamma oscillations during encoding predict subsequent recall. *Journal of Neuroscience*, 23(34),  
689        10809–10814.
- 690 Serruya, M. D., Sederberg, P. B., & Kahana, M. J. (2014). Power shifts track serial position  
691        and modulate encoding in human episodic memory. *Cerebral Cortex*, 24, 403–413. doi:  
692        10.1093/cercor/bhs318
- 693 Spiers, H. J., Burgess, N., Hartley, T., Vargha-Khadem, F., & O'Keefe, J. (2001). Bilateral hippocampal  
694        pathology impairs topographical and episodic memory but not visual pattern matching.  
695        *Hippocampus*, 11(6).
- 696 Spiers, H. J., Burgess, N., Maguire, E. A., Baxendale, S. A., Hartley, T., Thompson, P. J., & O'Keefe, J.  
697        (2001). Unilateral temporal lobectomy patients show lateralized topographical and episodic  
698        memory deficits in a virtual town. *Brain*, 124(Pt 12), 2476-89.
- 699 Spiers, H. J., Maguire, E. A., & Burgess, N. (2001). Hippocampal amnesia. *Neurocase*, 7, 357–382.
- 700 Squire, L. (1992). Memory and the hippocampus: A synthesis from findings with rats, monkeys,  
701        and humans. *Psychological Review*, 99, 195-231.
- 702 Squire, L., Stark, C., & Clark, R. (2004). The medial temporal lobe. *Annual Review of Neuroscience*, 27,  
703        279–306.
- 704 Staresina, B. P., & Davachi, L. (2009). Mind the gap: binding experiences across space and time in  
705        the human hippocampus. *Neuron*, 63(2), 267–276.
- 706 Suthana, N., Ekstrom, A. D., Moshirvaziri, S., Knowlton, B. J., & Bookheimer, S. Y. (2009). Human  
707        hippocampal ca1 involvement during allocentric encoding of spatial information. *Journal of*  
708        *Neuroscience*.
- 709 Suthana, N., & Fried, I. (2014). Deep brain stimulation for enhancement of learning and memory.  
710        *Neuroimage*, 85, 996–1002.
- 711 Suthana, N., Haneef, Z., Stern, J., Mukamel, R., Behnke, E., Knowlton, B., & Fried, I. (2012). Memory  
712        enhancement and deep-brain stimulation of the entorhinal area. *The New England Journal of*  
713        *Medicine*, 366, 502–10.
- 714 Tibshirani, R. J., Walther, G., & Hastie, T. (2001). Estimating the number of clusters in a dataset via  
715        the gap statistic. *Journal of the Royal Statistical Society: Series B (Statistical Methodology)*, 63(2),  
716        411-423.
- 717 Wang, H., Suh, J. W., Das, S. R., Pluta, J. B., Craige, C., Yushkevich, P., et al. (2013). Multi-atlas

718 segmentation with joint label fusion. *Pattern Analysis and Machine Intelligence, IEEE Transactions*  
719 *on*, 35(3), 611–623.

720 Wang, J. X., Rogers, L. M., Gross, E. Z., Ryals, A. J., Dokucu, M. E., Brandstatt, K. L., . . . Voss,  
721 J. L. (2014, August). Targeted enhancement of cortical-hippocampal brain networks and  
722 associative memory. *Science*, 345(6200), 1054–1057.

723 Watrous, A. J., Tandon, N., Conner, C. R., Pieters, T., & Ekstrom, A. D. (2013). Frequency-specific  
724 network connectivity increases underlie accurate spatiotemporal memory retrieval. *Nature*  
725 *Neuroscience*, 16(3), 349–356.

726 Yushkevich, P. A., Pluta, J. B., Wang, H., Xie, L., Ding, S.-L., Gertje, E. C., . . . Wolk, D. A. (2015).  
727 Automated volumetry and regional thickness analysis of hippocampal subfields and medial  
728 temporal cortical structures in mild cognitive impairment. *Human Brain Mapping*, 36(1),  
729 258–287.

730 **Competing Financial Interests.** The authors declare no competing financial interests.

731 **Acknowledgements.** This work was supported by the DARPA Restoring Active Memory (RAM)  
732 program (Cooperative Agreement N66001-14-2-4032) and the National Institutes of Health  
733 (MH061975). The views, opinions, and/or findings expressed are those of the authors and  
734 should not be interpreted as representing the official views or policies of the Department of Defense  
735 or the U.S. Government. We thank Blackrock Microsystems for providing neural recording and  
736 stimulation equipment. We thank Michael Kahana and Daniel Rizzuto for assisting with data  
737 collection and for scientific discussions.
